# Supplementary material
Source: publisher figshare collection journal article supplement (https://diabetesjournals.figshare.com/ndownloader/files/22374438)
Supplement: Supplementary file 1 [file 22374438]

| **Supplemental Table 1. Primer sets for qRT-PCR analysis** | | | |
| --- | --- | --- | --- |
| Gene | Direction | Primer sequence | Base pairs | |
| VIP | Forward | TTCACCAGCGATTACAGCAG | 175 |
| Reverse | TCACAGCCATTTGCTTTCTG |
| VIPR1 | Forward | GATGTGGGACAACCTCACCTG | 102 |
| Reverse | TAGCCGTGAATGGGGGAAAAC |
| NGF | Forward | GACCCCACTCTCAACAGGAT | 129 |
| Reverse | ACCACAGCCACAGACATCAA |
| CNTF | Forward | ACCACAGGCATATTTCGTCA | 144 |
| Reverse | GGTGGAAGGATAATGCCCTA |
| IL1β | Forward | AAGGAGAACCAAGCAACGACAAAA | 213 |
| Reverse | TGGGGAACTCTGCAGACTCAAACT |
| IL1RN | Forward | TGAGGGTTTTTCCGCTTCTGA | 90 |
| Reverse | CTTGCAGGGTCTTTTCCCAGA |
| CXCL2 | Forward | GGCTGTTGTGGCCAGTGAA | 150 |
| Reverse | ACTTTTTGACCGCCCTTGAGA |
| NOS2 | Forward | TGTCTGCAGCACTTGGATCAG | 150 |
| Reverse | AAACTTCGGAAGGGAGCAATG |
| CXCL5 | Forward | GCCCTACGGTGGAAGTCATA | 132 |
| Reverse | GTGCATTCCGCTTAGCTTTC |
| IL10 | Forward | TGCTAACCGACTCCTTAATGCA | 151 |
| Reverse | TTCTCACCCAGGGAATTCAAA |
| Actin | Forward | CGTGGGCCGCCCTAGGCACC | 243 |
| Reverse | TTGGCCTTAGGGTTCAGGGGGG |
